# Supplementary material for: Effect of Trace Metal Ions on the Conformational Stability of the Visual Photoreceptor Rhodopsin
Source: MDPI journal article supplement (doi:10.3390/ijms241311231), 2023-07-07
Supplement: s1 [file s1]

## Supplementary material

### Effect of Trace Metal Ions on the Conformational Stability of the Visual Photoreceptor Rhodopsin

Feifei Wang, Pol Fernandez-Gonzalez, Eva Ramon, Patricia Gomez-Gutierrez, Margarita Morillo and Pere Garriga \*

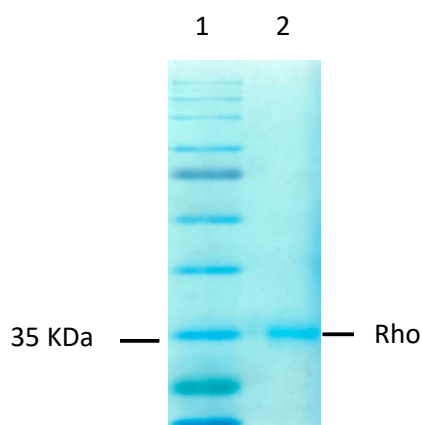

**Figure. S1.** SDS-PAGE electrophoresis of the Rho purified sample used in the characterization experiments. 1, MW marker; 2, Rho.

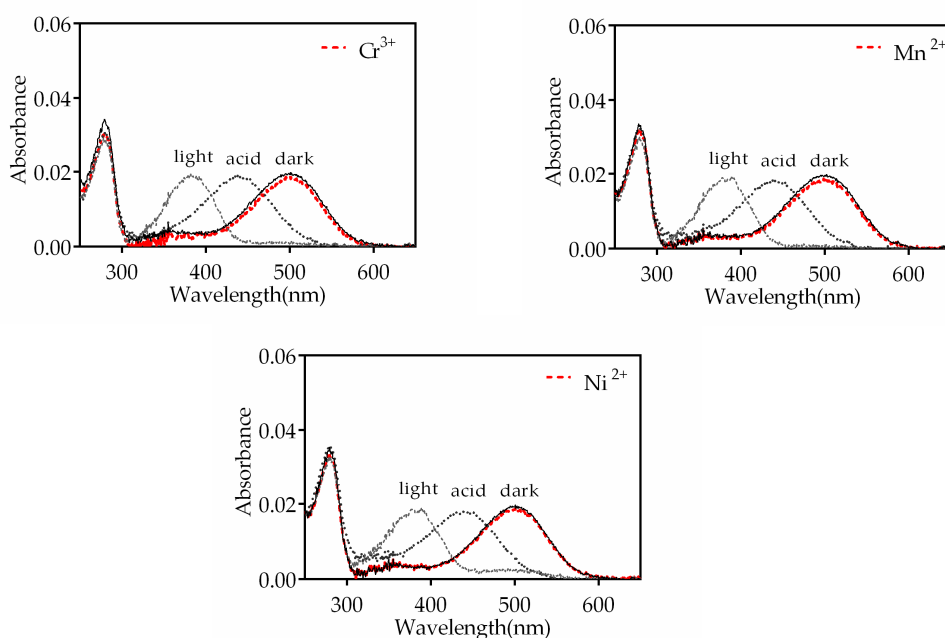

**Figure S2.** The UV-vis absorption spectra of Rho were obtained following pre-treatment with  $\text{Cr}^{3+}$ ,  $\text{Mn}^{2+}$ , and  $\text{Ni}^{2+}$ , and final concentration is  $50 \mu\text{M}$ . Spectra of samples were recorded in the dark state (dark, solid line), after metal addition (dark, dashed red line), upon photobleaching for 30 s (light, dashed line) and after acidification with 2N  $\text{H}_2\text{SO}_4$  (acid, dotted line). All the above experiments were conducted at  $20^\circ\text{C}$ .

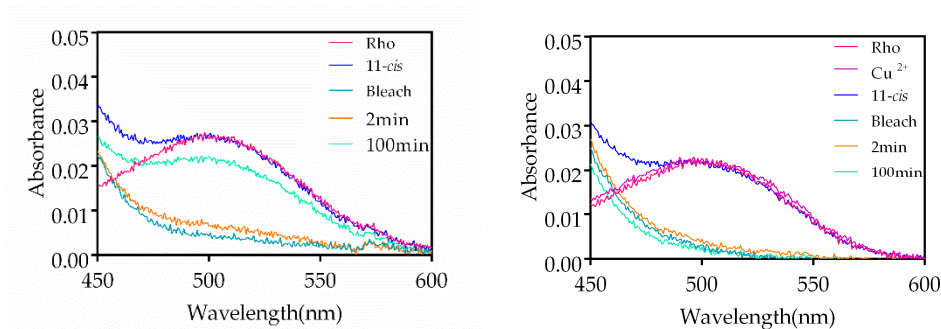

**Figure S3.** The UV-vis absorption spectra of regeneration (**left**) without and (**right**) with  $\text{Cu}^{2+}$ . The chromophore regeneration assay was carried out at 20 °C in the dark. The details are described in the Methods. 11-*cis* means adding 11-*cis* solution. Bleach means use light source to bleach sample. 2 min and 100 min means regeneration at 2 and 100min. From this figure, it indicated that with  $\text{Cu}^{2+}$  almost regenerated nothing.

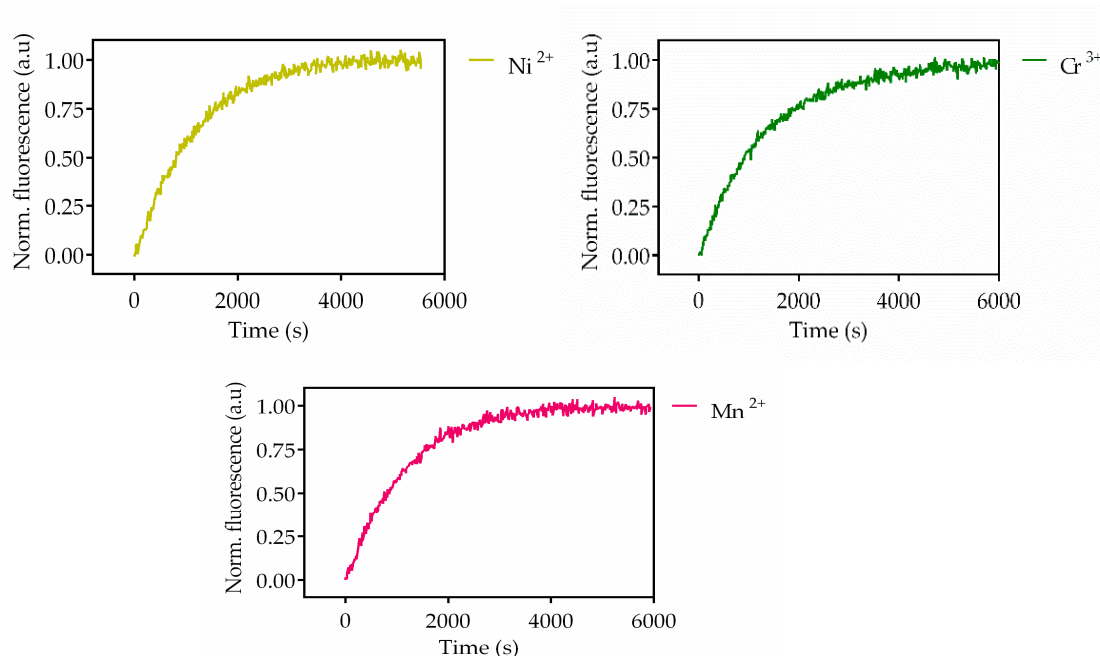

**Figure S4.** Meta II stability of Rho treated with  $\text{Ni}^{2+}$ ,  $\text{Cr}^{3+}$  and  $\text{Mn}^{2+}$ . Fluorescence curves were recorded on a PTI Quanta Master 4 spectrofluorometer with a sample of 0.5  $\mu\text{M}$  Rho in the absence and the presence of metals at 20 °C. The fluorescence signal of Trp265 gradually increased over time, as a result of retinal leaving its binding pocket, until it reached a plateau.
